# Supplementary material for: Identification of 2-hydroxyisocaproic acid production in lactic acid bacteria and evaluation of microbial dynamics during kimchi ripening
Source: PubMed Central journal article supplement (PMC5589888; doi:10.1038/s41598-017-10948-0), 2017-09-07
Supplement: 41598_2017_10948_MOESM1_ESM.pdf [file 41598_2017_10948_MOESM1_ESM.pdf]

**Supplementary information**

**Identification of 2-hydroxyisocaproic acid production in lactic acid bacteria  
and evaluation of microbial dynamics during kimchi ripening**

Boyeon Park†, Hyelyeon Hwang†, Ji Yoon Chang, Sung Wook Hong, Se Hee Lee, Min  
Young Jung, Sung-Oh Sohn, Hae Woong Park, and Jong-Hee Lee\*

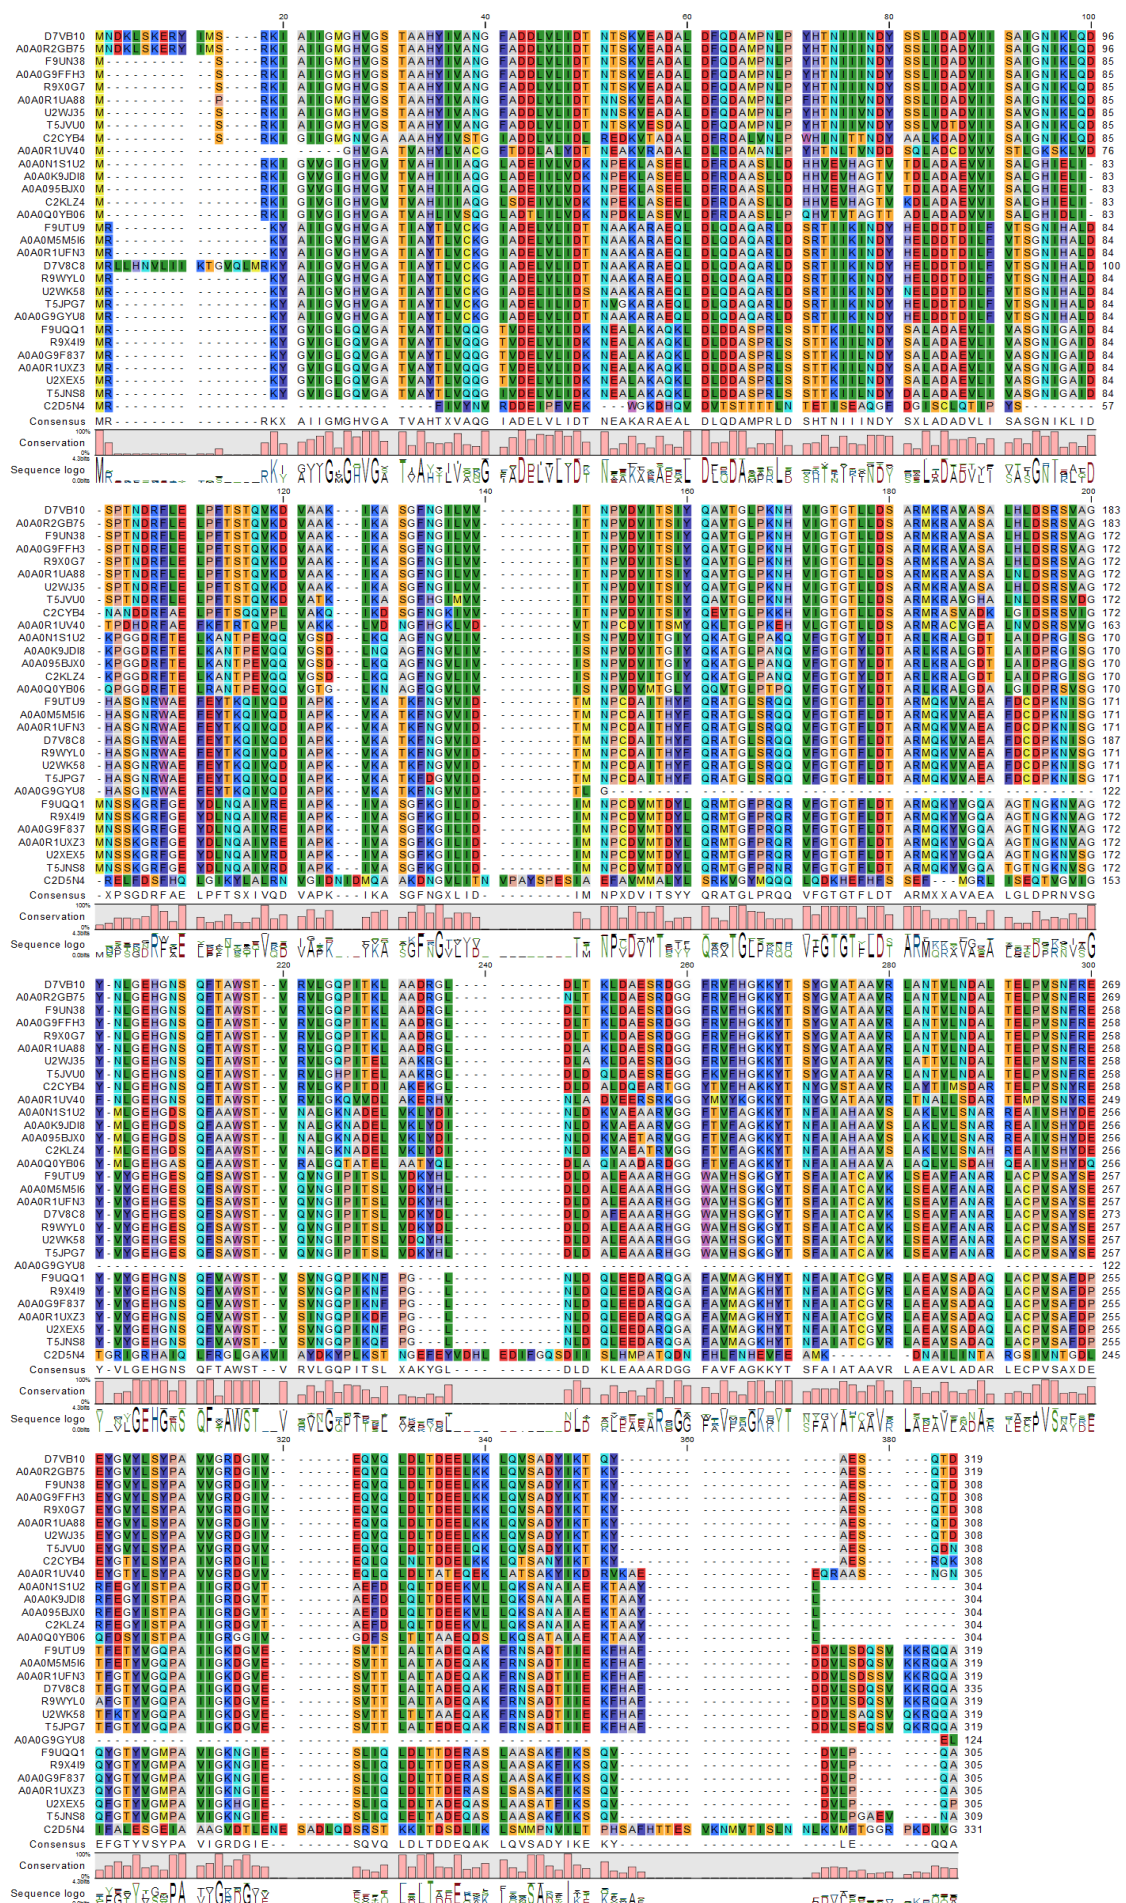

Supplementary figure S1. The multiple sequence alignment of 2-hydroxyisocaproate dehydrogenase of lactic acid bacteria using the ClustalW multi-alignment program

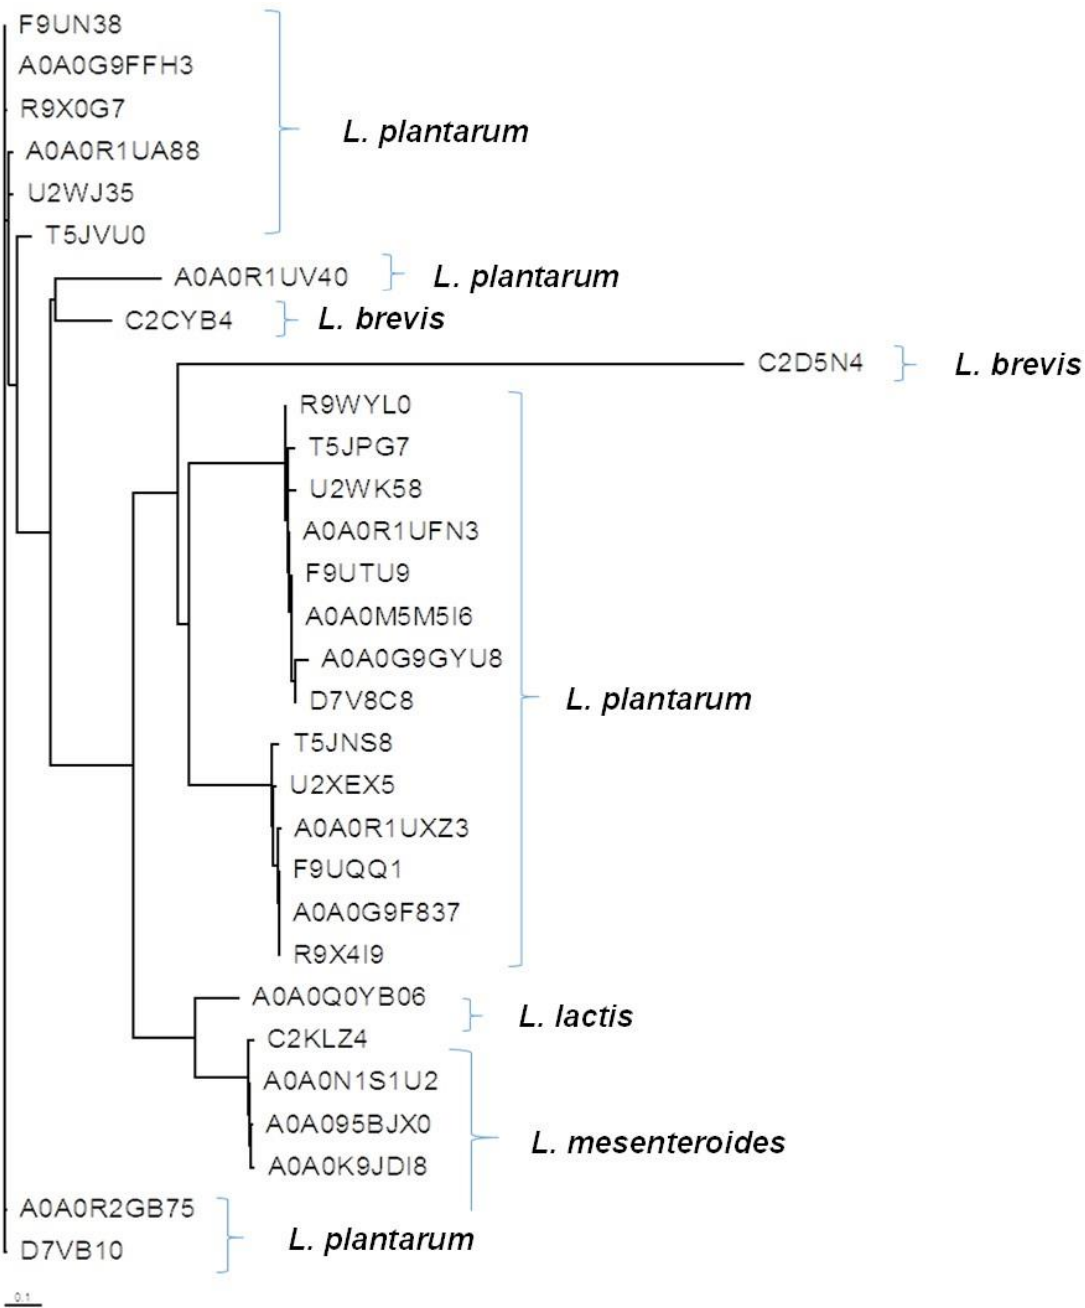

**Supplementary figure S2.** The phylogenetic trees constructed from 2-hydroxyisocaproate dehydrogenase amino acid sequence obtained Uniprot ([www.uniprot.org/](http://www.uniprot.org/)). The bar indicates 10% sequence divergence.

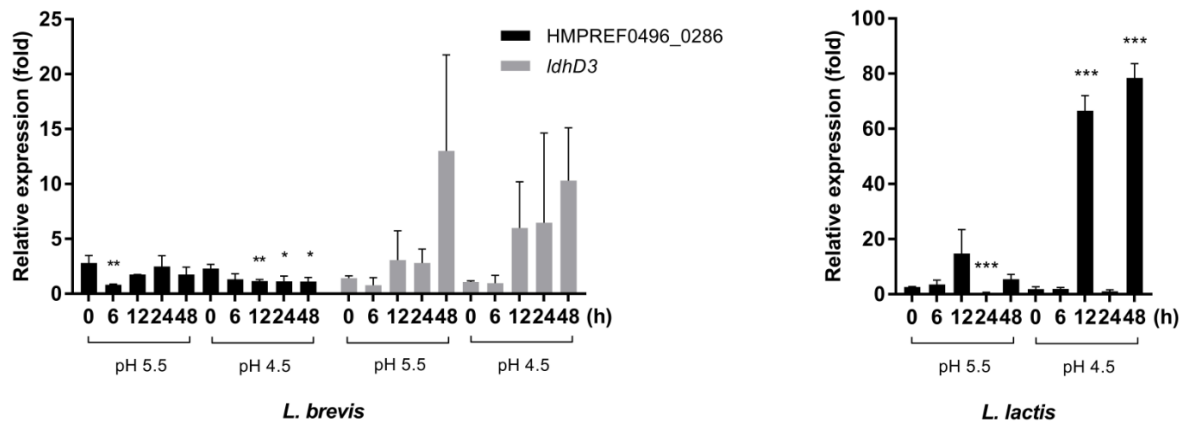

Supplementary figure S3. The transcription levels of the 2-hydroxyisocaproate dehydrogenase genes in *L. brevis* and *L. lactis* in MRS of pH 5.5 and 4.5 condition were determined via qRT-PCR. The mRNA expression values were normalized by the transcription levels by the bacteria cultivated in MRS (pH 6.2). Asterisks indicate significant differences (\*\* $P < 0.01$ ; \*\*\* $P < 0.001$ ; \* $P < 0.05$ ).

**Supplementary table S1. Conserved domain structure of HicD identified in NCBI search**Amino acid sequence of HicD of *Leuconostoc lactis* was compared BLASTP database

| Name       | Accession | Description                                                                       | Interval | E-value    |
|------------|-----------|-----------------------------------------------------------------------------------|----------|------------|
| HicDH_like | cd05291   | L-2-hydroxyisocaproate dehydrogenases and some bacterial L-lactate dehydrogenases | 3-304    | 6.39 E-149 |
| Ldh_1_N    | pfam00056 | lactate/malate dehydrogenase, NAD binding domain                                  | 4-145    | 4.04 E-30  |
| L-LDH-NAD  | TIGR01771 | L-lactate dehydrogenase                                                           | 7-299    | 5.50 E-96  |
| Mdh        | COG0039   | Malate/lactate dehydrogenase                                                      | 3-299    | 1.32 E-85  |
| ldh        | PRK00066  | L-lactate dehydrogenase                                                           | 1-300    | 3.45 E-73  |

**Supplementary Table S2. The primers for the real-time RT-PCR**

| Species                                                                                    | Primers            | Sequence                                                             | Reference                                                  |
|--------------------------------------------------------------------------------------------|--------------------|----------------------------------------------------------------------|------------------------------------------------------------|
| <i>Lactobacillus plantarum</i>                                                             | LPWCFS_hicD1       | 5'-ATTACACGCGTTAGACCATGC-3'                                          | In this study                                              |
|                                                                                            |                    | 5'-CTGTTGGCGTGATAATCCCG-3'                                           |                                                            |
|                                                                                            | LPWCFS_hicD2       | 5'-GCGACGTCTTTGACTTGTGT-3'                                           |                                                            |
|                                                                                            |                    | 5'-CTTGCCGATGACCTTGTC-3'                                             |                                                            |
|                                                                                            | LPWCFS_hicD3       | 5'-ATCGGACACCACAAGTAGCA-3'                                           |                                                            |
|                                                                                            |                    | 5'-GTATGTCGGACAAGCAGCTG-3'                                           |                                                            |
| <i>Lactobacillus brevis</i>                                                                | HMPREF0496_0286    | 5'-GATTGGACTTGGATGCGCTT-3'                                           | In this study                                              |
|                                                                                            |                    | 5'-TGCTCTAAAATGCCGTCACG-3'                                           |                                                            |
|                                                                                            | Brevis ldhD3       | 5'-TTGGCGTTGAGAAATGTCGG-3'                                           |                                                            |
|                                                                                            |                    | 5'-TTCCTGATTAGACGCCCA-3'                                             |                                                            |
| <i>Leuconostoc lactis</i>                                                                  | Lactis_AN225_00170 | 5'-AAGACACCTTGAAAACCCGC-3'                                           | In this study                                              |
|                                                                                            |                    | 5'-TTGATTTTCGTGATGCCGCT-3'                                           |                                                            |
| <i>Leuconostoc mesenteroides</i>                                                           | LM_LH61_00190      | 5'-GCGTGACTTCGACATGATG-3'                                            | In this study                                              |
|                                                                                            |                    | 5'-TTGTTGGCATTGGACATGTTG-3'                                          |                                                            |
| <i>Lactobacillus plantarum</i><br><i>Lactobacillus brevis</i><br><i>Leuconostoc lactis</i> | 16S rRNA           | 5'-AGCAGTAGGGAATCTTCCA-3'<br>5'-CAC CGC TAC ACA TGG AG-3'            | Walter <i>et al.</i> (2001)<br>Heilig <i>et al.</i> (2002) |
| <i>Leuconostoc mesenteroides</i>                                                           | 16S rRNA           | 5'-AGC GTT ATC CGG ATT TAT TG-3'<br>5'-CTA CGC ATT CCA CCG CTA CA-3' | Minghui Yan <i>et al.</i> (2016)                           |
